# Supplementary material for: Preparation of Nano-SiO2 by silica sol in-situ complexation protective precipitation method
Source: Research Square preprint supplement (doi:10.21203/rs.3.rs-1550939/v1), 2022-04-18
Supplement: Supplementary file 1 [file a83fe6cc193c4f34a6440c43.docx]

### Statements & Declarations

### Funding

This work was supported by the National Natural Science Foundation of China (20577010, 20971043, 29201004)

**Competing Interests**

The authors declare that they have no known competing financial interests or personal relationships that could have appeared to inflfluence the work reported in this paper.

**Author Contributions**

**Yubing Yang**: Methodology, Investigation. **Yuxiang Yang**: Conceptualization, Supervision, Writing - original draft, Project administration, Funding acquisition, Writing - review & editing, Data curation. **Chaoying NI**: Formal analysis, Visualization, Validation, Resources, Software.

### Data Availability

Supplementary data to this article can in the following article.

[1]T.M. Tian, Preparation of silica sol and nano silica and immobilization of horseradish peroxidase [D]; East China University of Science and Technology. 2014
